# Supplementary material for: Exploring the stable structures of cerium oxide nanoclusters using high-dimensional neural network potential
Source: Royal Society of Chemistry journal article supplement (doi:10.1039/d3na01119d), 2024-01-01
Supplement: d3na01119d1.pdf [file d3na01119d1.pdf]

# Exploring the Stable Structure of Cerium Oxide Nanoclusters using High-Dimensional Neural Network Potential

Huabing Cai,<sup>a,b</sup> Qinghua Ren,<sup>\*a</sup> Yi Gao<sup>\*b,c,d</sup>

- Department of Chemistry, Shanghai University, 99 Shangda Road, Shanghai 200444, China.
- Shanghai Institute of Applied Physics, Chinese Academy of Sciences, Shanghai 201800, China.
- Phonon Science Research Center for Carbon Dioxide, Shanghai Advanced Research Institute, Chinese Academy of Sciences, Shanghai 201210, China.
- Key Laboratory of Low-Carbon Conversion Science & Engineering, Shanghai Advanced Research Institute, Chinese Academy of Sciences, Shanghai 201210, China.

Email: [qinghua.ren@shu.edu.cn](mailto:qinghua.ren@shu.edu.cn) and [gaoyi@sari.ac.cn](mailto:gaoyi@sari.ac.cn)

## The high-dimensional neural network<sup>1,2</sup>

The main idea of this neural network is to represent the total energy as the sum of the energies of all the atoms,

$$E = \sum_i E_i$$

The  $E_i$  represent the energy of atom  $i$ . The atomic energies are trained by atomic neural network using the symmetry functions to represent the structural and chemical environment information of each atom. In this work, we choose the following three symmetry functions to represent local chemical environment of cerium atoms and oxygen atoms from Cartesian coordinates,

Radial symmetry function

$$G_i^{radial} = \sum_{j \neq i} e^{-\eta(r_{ij}-r_s)^2} f_c(r_{ij})$$

Narrow angular symmetry function

$$G_i^{ang.n.} = 2^{1-\zeta} \sum_{\substack{j,k \neq i \\ j < k}} (1 + \lambda \cos \theta_{ijk})^\zeta e^{-\eta((r_{ij}-r_s)^2 + (r_{ik}-r_s)^2 + (r_{jk}-r_s)^2)} f_c(r_{ij}) f_c(r_{ik}) f_c(r_{jk})$$

Wide angular symmetry function

$$G_i^{ang.w.} = 2^{1-\zeta} \sum_{\substack{j,k \neq i \\ j < k}} (1 + \lambda \cos \theta_{ijk})^\zeta e^{-\eta((r_{ij}-r_s)^2 + (r_{ik}-r_s)^2)} f_c(r_{ij}) f_c(r_{ik})$$

$f_c(r_{ij})$  represents the cutoff function, which has the form

$$f_c(r_{ij}) = \begin{cases} 0.5 \times \left[ \cos\left(\frac{\pi r_{ij}}{r_c}\right) + 1 \right] & \text{for } r_{ij} \leq r_c \\ 0 & \text{for } r_{ij} > r_c \end{cases}$$

$r_{ij}$  represents the distance between atom  $i$  and atom  $j$ .  $r_c$  represents the cutoff radius.

Table S1: Parameters of symmetry functions used for neural network performed using the n2p2 code<sup>3</sup>

| Radial |       |       | Angular |           |         |       |       |
|--------|-------|-------|---------|-----------|---------|-------|-------|
| $\eta$ | $r_s$ | $r_c$ | $\eta$  | $\lambda$ | $\zeta$ | $r_s$ | $r_c$ |
| 2      | 1.5   | 6     | 0.2222  | -1        | 1       | 0     | 6     |
| 2      | 2     | 6     | 0.2222  | 1         | 1       | 0     | 6     |
| 2      | 2.5   | 6     | 0.2222  | -1        | 6       | 0     | 6     |
| 2      | 3     | 6     | 0.2222  | 1         | 6       | 0     | 6     |
| 2      | 3.5   | 6     | 0.0408  | -1        | 1       | 0     | 6     |
| 2      | 4     | 6     | 0.0408  | 1         | 1       | 0     | 6     |
| 2      | 4.5   | 6     | 0.0408  | -1        | 6       | 0     | 6     |
| 2      | 5     | 6     | 0.0408  | 1         | 6       | 0     | 6     |
| 2      | 5.5   | 6     | 0.0165  | -1        | 1       | 0     | 6     |
|        |       |       | 0.0165  | 1         | 1       | 0     | 6     |
|        |       |       | 0.0165  | -1        | 6       | 0     | 6     |
|        |       |       | 0.0165  | 1         | 6       | 0     | 6     |

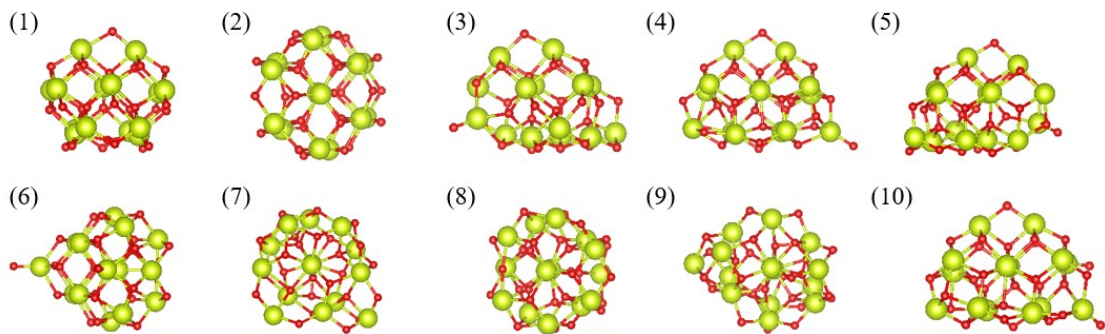

**Fig.S1** The top 10 minimums of nanoclusters  $Ce_{14}O_{27}$ . (red: oxygen atoms, green: cerium atoms)

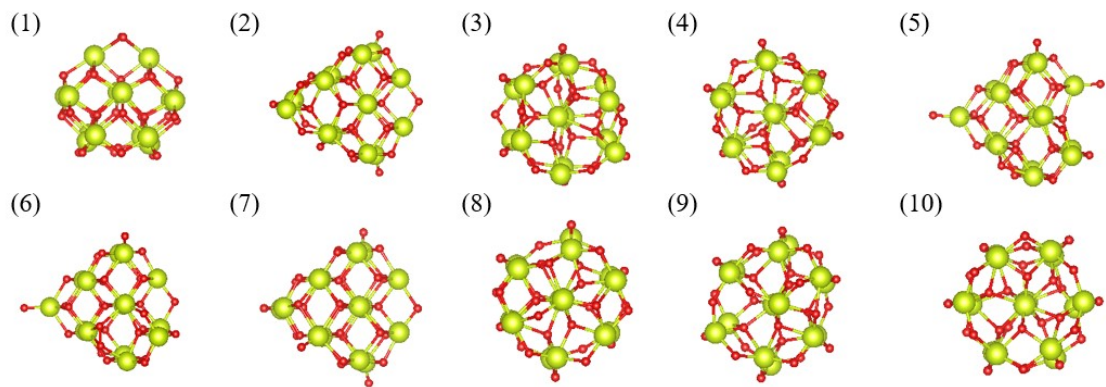

**Fig.S2** The top 10 minimums of nanoclusters  $Ce_{14}O_{28}$ . (red: oxygen atoms, green: cerium atoms)

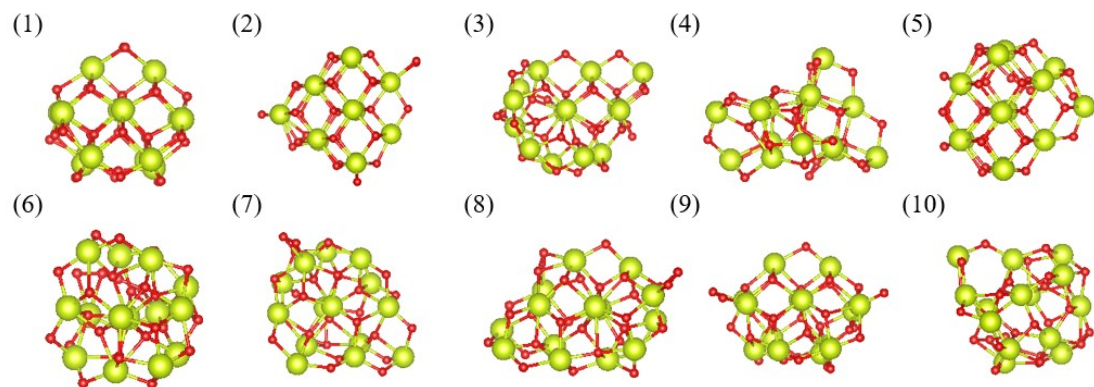

**Fig.S3** The top 10 minimums of nanoclusters  $Ce_{14}O_{29}$ . (red: oxygen atoms, green: cerium atoms)

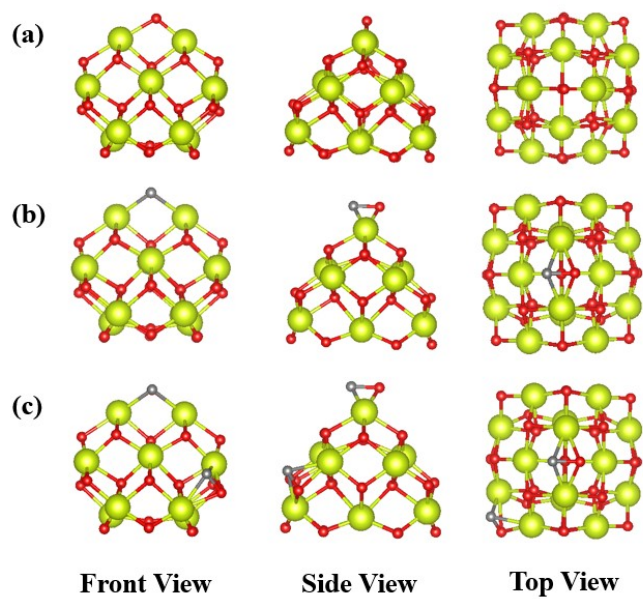

**Fig.S4** The structures comparison of  $Ce_{14}O_{27}$ ,  $Ce_{14}O_{28}$ , and  $Ce_{14}O_{29}$ . (red: oxygen atoms, grey: addition oxygen atoms, green: cerium atoms)

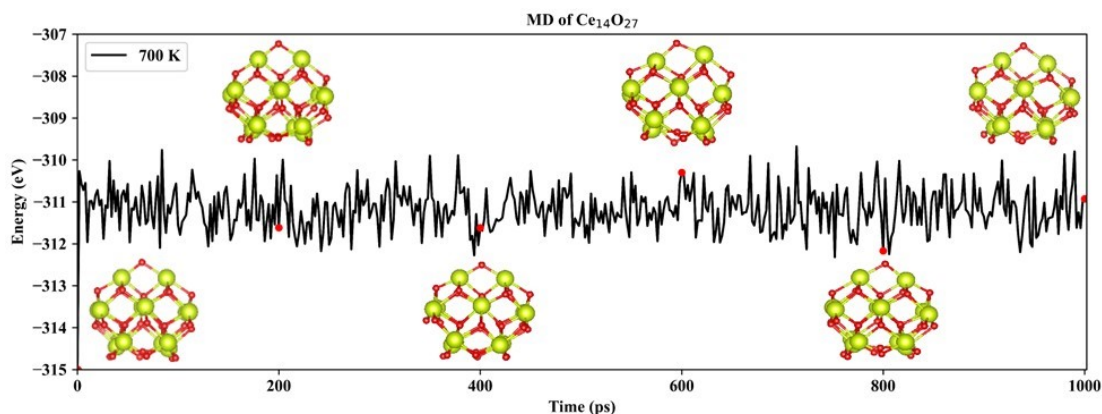

**Fig.S5** Snapshots of the most stable nanocluster  $Ce_{14}O_{27}$  extracted every 200 ps from 700 K MD trajectories.

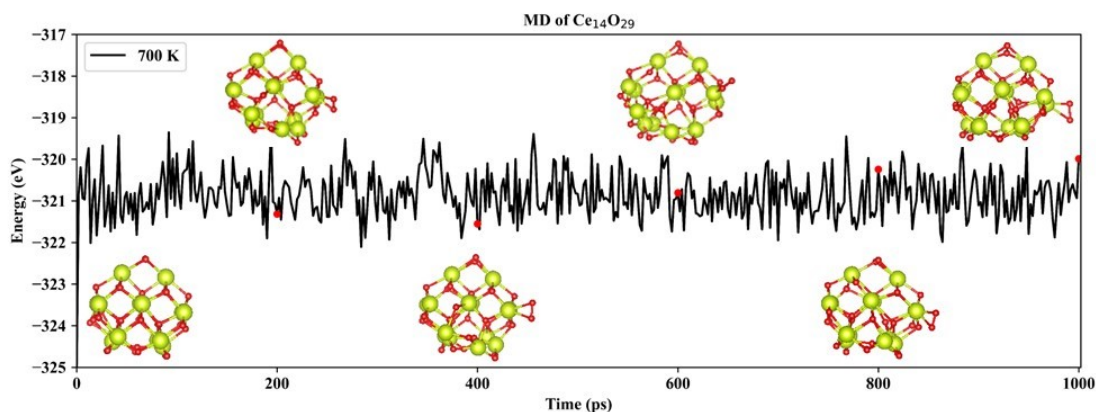

**Fig.S6** Snapshots of the most stable nanocluster  $Ce_{14}O_{29}$  extracted every 200 ps from 700 K MD trajectories.

### The coordinates of the most stable $Ce_{14}O_{27}$ (.xyz format)

41

O Ce

O 7.663066 9.886884 8.103913

O 11.654997 11.078156 9.731121

O 9.681866 9.432853 4.612806

|    |           |           |           |
|----|-----------|-----------|-----------|
| O  | 7.711274  | 8.107805  | 5.915162  |
| O  | 9.573336  | 10.029844 | 11.371962 |
| O  | 11.457870 | 8.050962  | 6.266395  |
| O  | 11.667717 | 13.059427 | 11.707449 |
| O  | 11.250403 | 6.227804  | 4.245559  |
| O  | 13.670287 | 9.744797  | 11.261906 |
| O  | 9.669910  | 12.858351 | 8.896226  |
| O  | 8.077448  | 12.420979 | 5.787269  |
| O  | 11.558014 | 8.327799  | 12.479060 |
| O  | 11.568368 | 14.271835 | 7.654282  |
| O  | 15.609321 | 9.182742  | 8.524478  |
| O  | 7.955402  | 7.041839  | 10.587491 |
| O  | 14.887578 | 6.567616  | 10.280367 |
| O  | 13.097531 | 8.192351  | 9.012982  |
| O  | 9.854687  | 8.388128  | 9.118485  |
| O  | 10.015035 | 10.888994 | 6.975340  |
| O  | 13.023679 | 8.937119  | 4.200226  |
| O  | 15.139023 | 7.309918  | 5.964425  |
| O  | 13.113317 | 10.570622 | 7.006850  |
| O  | 13.156794 | 6.066869  | 7.220040  |
| O  | 13.878901 | 12.633309 | 9.404819  |
| O  | 9.465807  | 6.323635  | 7.189558  |
| O  | 11.250365 | 12.421795 | 5.075002  |
| O  | 11.414563 | 6.492488  | 10.462792 |
| Ce | 11.404906 | 6.876673  | 8.230675  |
| Ce | 10.049023 | 13.222273 | 6.607650  |
| Ce | 11.790135 | 10.331182 | 5.384389  |
| Ce | 9.652025  | 7.252866  | 5.105847  |
| Ce | 11.895367 | 13.441673 | 9.660338  |
| Ce | 15.037662 | 7.229935  | 8.122348  |
| Ce | 8.072752  | 10.347711 | 5.899452  |
| Ce | 11.735417 | 10.808419 | 12.058903 |
| Ce | 9.484694  | 10.720157 | 9.208440  |
| Ce | 7.803768  | 7.559018  | 8.305671  |
| Ce | 9.715111  | 7.770212  | 11.370380 |
| Ce | 13.314571 | 7.588308  | 11.215500 |
| Ce | 13.914300 | 10.533986 | 8.997531  |
| Ce | 13.209753 | 7.047938  | 5.062960  |

**The coordinates of the most stable Ce<sub>14</sub>O<sub>28</sub> (.xyz format)**

42

O Ce

|   |           |           |          |
|---|-----------|-----------|----------|
| O | 10.115682 | 5.811046  | 9.956292 |
| O | 12.990373 | 13.383770 | 8.654510 |

|    |           |           |           |
|----|-----------|-----------|-----------|
| O  | 12.610801 | 6.580429  | 8.866866  |
| O  | 8.528120  | 11.418891 | 11.179386 |
| O  | 14.773922 | 9.809621  | 9.221152  |
| O  | 14.169817 | 7.568423  | 11.813012 |
| O  | 9.682199  | 14.009515 | 8.130670  |
| O  | 12.272331 | 12.544620 | 5.431630  |
| O  | 10.772294 | 12.019706 | 9.665606  |
| O  | 6.712742  | 8.447321  | 10.577548 |
| O  | 9.518198  | 8.410007  | 4.978011  |
| O  | 11.358785 | 5.859905  | 5.785236  |
| O  | 11.093703 | 8.196656  | 7.199659  |
| O  | 14.411002 | 12.216060 | 10.652491 |
| O  | 12.267140 | 9.694798  | 3.918391  |
| O  | 8.699368  | 6.975352  | 7.958113  |
| O  | 8.998705  | 9.363416  | 9.372544  |
| O  | 9.812107  | 11.026721 | 6.893133  |
| O  | 10.624299 | 14.276491 | 11.220259 |
| O  | 12.194277 | 9.066133  | 10.211775 |
| O  | 13.548058 | 8.626337  | 5.983358  |
| O  | 6.912906  | 9.854389  | 7.668502  |
| O  | 12.091511 | 11.300218 | 11.994450 |
| O  | 9.926711  | 8.073148  | 11.641401 |
| O  | 13.191690 | 8.114167  | 12.814864 |
| O  | 12.867047 | 10.851174 | 7.492783  |
| O  | 15.244422 | 11.681194 | 6.408547  |
| O  | 7.051506  | 12.614040 | 9.318725  |
| Ce | 10.350452 | 10.212980 | 11.042562 |
| Ce | 6.960058  | 10.491956 | 9.666339  |
| Ce | 12.369885 | 13.195621 | 10.815004 |
| Ce | 13.154785 | 8.650676  | 8.136471  |
| Ce | 8.412161  | 7.295896  | 10.169769 |
| Ce | 10.725871 | 6.006104  | 7.781203  |
| Ce | 11.554510 | 7.924052  | 4.912853  |
| Ce | 8.845906  | 9.134656  | 6.935284  |
| Ce | 14.676706 | 11.908537 | 8.417803  |
| Ce | 13.512980 | 10.866552 | 5.231270  |
| Ce | 11.965221 | 6.888490  | 11.164495 |
| Ce | 8.926458  | 13.433464 | 9.995328  |
| Ce | 14.013224 | 9.939650  | 11.499090 |
| Ce | 11.163474 | 12.603255 | 7.321141  |

**The coordinates of the most stable Ce<sub>14</sub>O<sub>29</sub> (.xyz format)**

43

O Ce

|    |           |           |           |
|----|-----------|-----------|-----------|
| O  | 10.096267 | 5.802702  | 9.963305  |
| O  | 13.023787 | 13.338359 | 8.661959  |
| O  | 12.605649 | 6.561892  | 8.877320  |
| O  | 8.538922  | 11.421655 | 11.175012 |
| O  | 14.755538 | 9.784024  | 9.258139  |
| O  | 14.151260 | 7.548267  | 11.848949 |
| O  | 9.705625  | 13.975443 | 8.092520  |
| O  | 12.241113 | 12.474038 | 5.395965  |
| O  | 10.786941 | 12.008877 | 9.667855  |
| O  | 6.694128  | 8.453777  | 10.571016 |
| O  | 9.513947  | 8.404178  | 4.994242  |
| O  | 11.339269 | 5.842449  | 5.801012  |
| O  | 11.090933 | 8.182919  | 7.214348  |
| O  | 14.427209 | 12.193623 | 10.681068 |
| O  | 12.295611 | 9.674783  | 3.924985  |
| O  | 8.681298  | 6.969016  | 7.967079  |
| O  | 8.985276  | 9.358759  | 9.383656  |
| O  | 9.839733  | 10.995024 | 6.917371  |
| O  | 10.647105 | 14.280490 | 11.187314 |
| O  | 12.188402 | 9.053157  | 10.212802 |
| O  | 13.526678 | 8.566593  | 5.989969  |
| O  | 6.918421  | 9.882491  | 7.667952  |
| O  | 15.639878 | 10.960236 | 6.501083  |
| O  | 12.092049 | 11.285251 | 12.005931 |
| O  | 9.913522  | 8.064806  | 11.645858 |
| O  | 13.159906 | 8.096968  | 12.841043 |
| O  | 12.935908 | 10.846620 | 7.466771  |
| O  | 15.174282 | 12.326839 | 6.214855  |
| O  | 7.063369  | 12.623341 | 9.324018  |
| Ce | 10.346512 | 10.201652 | 11.038873 |
| Ce | 6.956644  | 10.497947 | 9.667779  |
| Ce | 12.386978 | 13.174287 | 10.826112 |
| Ce | 13.158199 | 8.624398  | 8.135381  |
| Ce | 8.395638  | 7.291010  | 10.176323 |
| Ce | 10.708621 | 5.994251  | 7.789719  |
| Ce | 11.554372 | 7.910556  | 4.925321  |
| Ce | 8.839733  | 9.122964  | 6.942354  |
| Ce | 14.696910 | 11.871054 | 8.460087  |
| Ce | 13.545364 | 10.845901 | 5.212686  |
| Ce | 11.950598 | 6.876740  | 11.170578 |
| Ce | 8.949909  | 13.422896 | 9.970196  |
| Ce | 13.999246 | 9.915459  | 11.523300 |
| Ce | 11.190536 | 12.579628 | 7.306636  |

## References

1. J. Behler and M. Parrinello, *Physical Review Letters*, 2007, **98**, 146401.
2. J. Behler, *J Chem Phys*, 2011, **134**, 074106.
3. A. Singraber, T. Morawietz, J. Behler and C. Dellago, *J Chem Theory Comput*, 2019, **15**, 3075-3092.
